# Supplementary material for: Two-dimensional Pd3(AsSe4)2 as a photocatalyst for the solar-driven oxygen evolution reaction: a first-principles study
Source: Royal Society of Chemistry journal article supplement (doi:10.1039/d3ra00592e), 2023-01-01
Supplement: d3ra00592e1.pdf [file d3ra00592e1.pdf]

## Supplementary Information

### **Two-dimensional Pd<sub>3</sub>(AsSe<sub>4</sub>)<sub>2</sub> as photocatalyst for the solar-driven oxygen evolution reaction: A first principles study**

Zhen Gao<sup>a</sup>, Xin He<sup>a</sup>, Wenzhong Li<sup>a</sup>, YaoHe<sup>a,\*</sup>, and Kai Xiong<sup>b</sup>

<sup>a</sup>*Department of Physics, Yunnan University, Kunming 650091, People's Republic of China.*

<sup>b</sup>*Materials Genome Institute, School of Materials and Energy, Yunnan University, Kunming 650091, People's Republic of China.*

\*E-mail: [yhe@ynu.edu.cn](mailto:yhe@ynu.edu.cn)

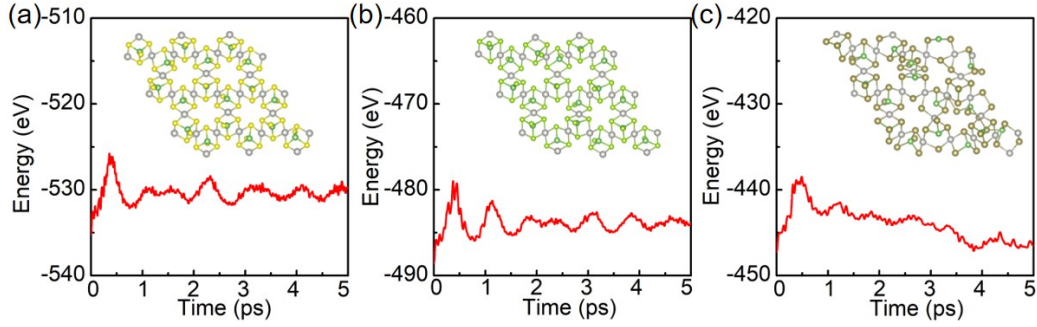

**Fig. S1.** Variation of the energy as a function of time for the (a)  $\text{Pd}_3(\text{AsS}_4)_2$ , (b)  $\text{Pd}_3(\text{AsSe}_4)_2$  and (c)  $\text{Pd}_3(\text{AsTe}_4)_2$  monolayers at 300K, respectively. The insets are the top view of the structure at the end of the AIMD simulation.

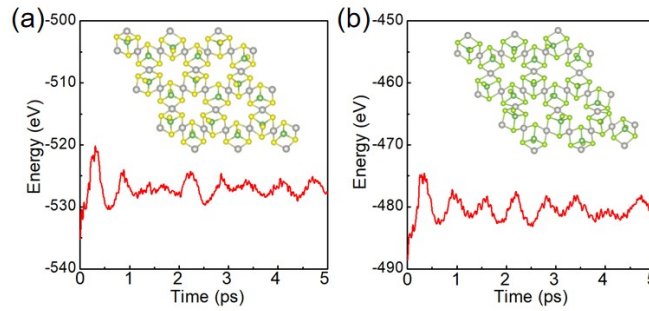

**Fig. S2.** Variation of the energy as a function of time for the (a)  $\text{Pd}_3(\text{AsS}_4)_2$  and (b)  $\text{Pd}_3(\text{AsSe}_4)_2$  monolayers at 500K, respectively. The insets are the top view of the structure at the end of the AIMD simulation.

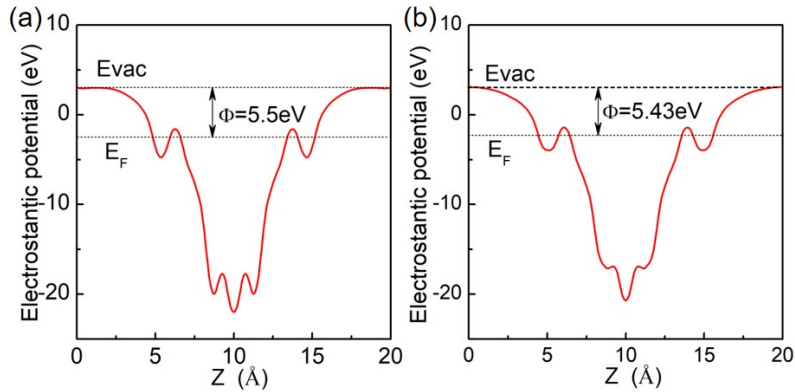

**Fig. S3.** The electrostatic potential diagrams of (a)  $\text{Pd}_3(\text{AsS}_4)_2$  monolayer and (b)  $\text{Pd}_3(\text{AsSe}_4)_2$  monolayer.

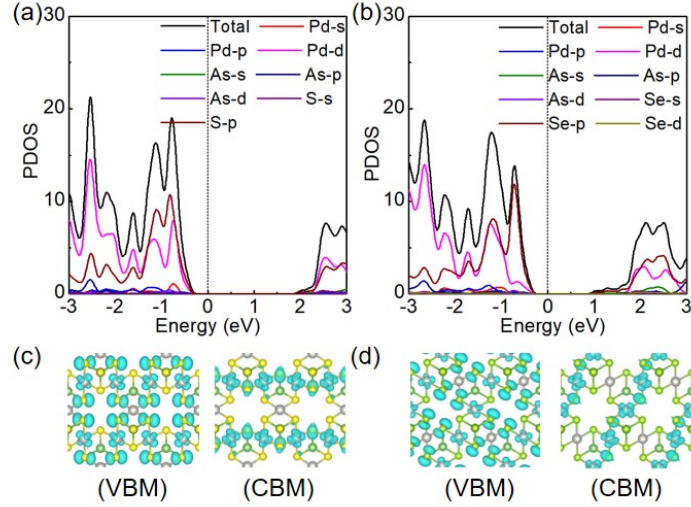

**Fig. S4.** Projected density of states PDOS of (a)  $\text{Pd}_3(\text{AsS}_4)_2$  and (b)  $\text{Pd}_3(\text{AsSe}_4)_2$  monolayers by the HSE06 method. Partial charge density distributions of the VBM and CBM for (c)  $\text{Pd}_3(\text{AsS}_4)_2$  and (d)  $\text{Pd}_3(\text{AsSe}_4)_2$  monolayer by the HSE06 method. The isosurface is set to be  $0.006\text{e}\text{\AA}^{-3}$ .

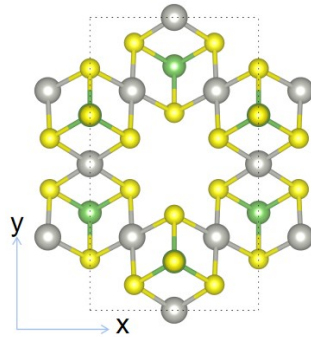

**Fig. S5.** The calculation of carrier migration rate is carried out in rectangular cell in the black dotted box, the x and y directions also been indicate.

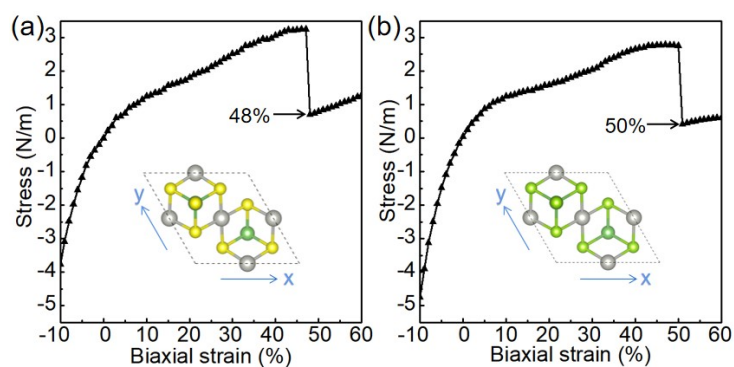

**Fig. S6.** Stress-strain curves for monolayer (a)  $\text{Pd}_3(\text{AsS}_4)_2$  and (b)  $\text{Pd}_3(\text{AsSe}_4)_2$ .

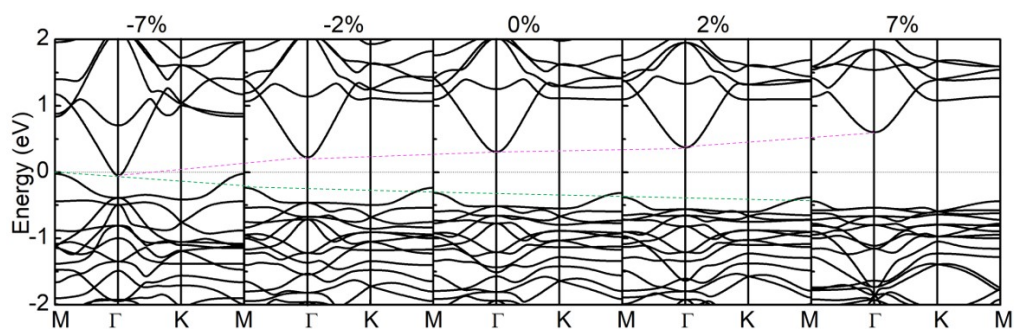

**Fig. S7.** Strain manipulated semiconductor-to-metal transition in a 2D  $\text{Pd}_3(\text{AsSe}_4)_2$  monolayer. Positive and negative strains correspond to expansion and compression, respectively. The Fermi energy was set to zero.

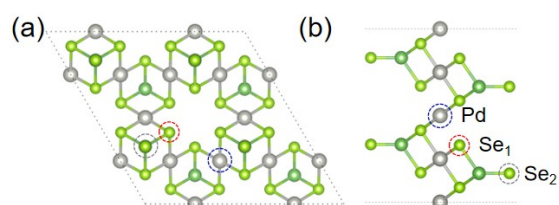

**Fig. S8.** Schematics for the examined surface sites of  $\text{Pd}_3(\text{AsSe}_4)_2$  monolayer.

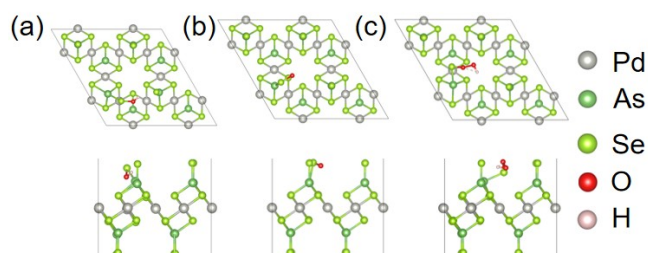

**Fig. S9.** (a-c) Side and top views of  $^*\text{OH}$ ,  $^*\text{O}$  and  $^*\text{OOH}$  oxygenated species on  $\text{Pd}_3(\text{AsSe}_4)_2$ , respectively.

**Table S1** The elastic constants (in GPa · nm) of the Pd<sub>3</sub>(AsS<sub>4</sub>)<sub>2</sub> and Pd<sub>3</sub>(AsSe<sub>4</sub>)<sub>2</sub> sheets.

| Phase                                             | C <sub>11</sub> | C <sub>22</sub> | C <sub>12</sub> | C <sub>66</sub> |
|---------------------------------------------------|-----------------|-----------------|-----------------|-----------------|
| Pd <sub>3</sub> (AsS <sub>4</sub> ) <sub>2</sub>  | 22.606          | 23.182          | 6.064           | 7.394           |
| Pd <sub>3</sub> (AsSe <sub>4</sub> ) <sub>2</sub> | 13.074          | 12.59           | 6.182           | 3.232           |

**Table S2** Total energy (E<sub>total</sub>) and isolated atoms energy (E(Pd), E(As), and E(X=S,Se,Te)) for Pd<sub>3</sub>(AsX<sub>4</sub>)<sub>2</sub> monolayers

| Phase                                             | E <sub>total</sub> | E(Pd)  | E(As)  | E(X)   |
|---------------------------------------------------|--------------------|--------|--------|--------|
| Pd <sub>3</sub> (AsS <sub>4</sub> ) <sub>2</sub>  | -61.691            | -1.471 | -0.178 | -0.171 |
| Pd <sub>3</sub> (AsSe <sub>4</sub> ) <sub>2</sub> | -56.723            | -1.471 | -0.178 | -0.168 |
| Pd <sub>3</sub> (AsTe <sub>4</sub> ) <sub>2</sub> | -52.299            | -1.471 | -0.178 | -0.164 |

**Table S3** Zero-point energy correction (E<sub>ZPE</sub>) and entropy contribution (TS, T=300K) of molecules and adsorbates in Pd<sub>3</sub>(AsSe<sub>4</sub>)<sub>2</sub>.

| Species          | E <sub>ZPE</sub> (eV) | -TS(eV) |
|------------------|-----------------------|---------|
| H <sub>2</sub>   | 0.27                  | -0.40   |
| H <sub>2</sub> O | 0.56                  | -0.67   |
| O <sub>2</sub> * | 0.13                  | -0.15   |
| O*               | 0.07                  | -0.06   |
| OH*              | 0.34                  | -0.13   |
| OOH*             | 0.43                  | -0.21   |

POSCAR file for Pd<sub>3</sub>(AsS<sub>4</sub>)<sub>2</sub>, Pd<sub>3</sub>(AsSe<sub>4</sub>)<sub>2</sub> and Pd<sub>3</sub>(AsTe<sub>4</sub>)<sub>2</sub> structures

Pd<sub>3</sub>(AsS<sub>4</sub>)<sub>2</sub>

|                     |                    |                     |
|---------------------|--------------------|---------------------|
| 1.000000000000000   |                    |                     |
| 6.8818668399406446  | 0.0000389470571953 | -0.0000231569341402 |
| -3.4408997051555521 | 5.9598833415797134 | 0.0000211413885933  |
| -0.0000666429790095 | 0.0000318664842659 | 20.0000000001029328 |
| As                  | Pd                 | S                   |
| 2                   | 3                  | 8                   |

Direct

|                    |                     |                    |
|--------------------|---------------------|--------------------|
| 0.6666662999474667 | 0.3333336871351923  | 0.3689681594826828 |
| 0.3333336108537173 | 0.6666662533490844  | 0.6310318428069922 |
| 0.5000000404508848 | 0.499999933218414   | 0.5000000146102551 |
| 0.5000001101093139 | -0.0000000029229524 | 0.5000000042330373 |
| 0.0000000470849879 | 0.5000000374120744  | 0.4999999808482354 |
| 0.1745624285801977 | 0.8254382513302255  | 0.5662950314024020 |
| 0.8254377448465952 | 0.1745618228567598  | 0.4337049243921134 |
| 0.1745654739126793 | 0.3491252099826351  | 0.5662964650826453 |
| 0.8254345129417553 | 0.6508747931111123  | 0.4337035184779852 |
| 0.6508746581225910 | 0.8254346803666071  | 0.5662966722820210 |
| 0.3491254179575750 | 0.1745652636473234  | 0.4337033841012106 |
| 0.3333333095964030 | 0.6666656855232748  | 0.7327134838352044 |
| 0.6666662335958379 | 0.3333341328868343  | 0.2672865184452140 |

Pd<sub>3</sub>(AsSe<sub>4</sub>)<sub>2</sub>

|                     |                    |                    |
|---------------------|--------------------|--------------------|
| 1.000000000000000   |                    |                    |
| 7.1796072722415207  | 0.0000443718012990 | 0.0000006094197159 |
| -3.5897652027385183 | 6.2176548502801197 | 0.0000143763468671 |
| 0.0000041947447757  | 0.0000559206460244 | 19.999999949340719 |
| As                  | Pd                 | Se                 |
| 2                   | 3                  | 8                  |

Direct

|                    |                    |                    |
|--------------------|--------------------|--------------------|
| 0.6666639500279478 | 0.3333308587052932 | 0.3608694336689975 |
| 0.3333359253250735 | 0.6666690289436394 | 0.6391305918352747 |
| 0.5000001392268388 | 0.5000001071719755 | 0.5000000015368947 |
| 0.5000001315861209 | 0.0000000633286411 | 0.5000000320449239 |
| 0.0000000860665329 | 0.5000000845987206 | 0.4999999502933594 |
| 0.1712073926584062 | 0.8287854658342164 | 0.5694302966195313 |
| 0.8287927177628914 | 0.1712146128704984 | 0.4305696808612484 |
| 0.1712132552273379 | 0.3424229096522065 | 0.5694309275287405 |
| 0.8287868266130912 | 0.6575771430622637 | 0.4305690219952427 |
| 0.6575766964299972 | 0.8287888531853020 | 0.5694316375288020 |
| 0.3424234210661334 | 0.1712112064740306 | 0.4305684369309101 |
| 0.3333388018659977 | 0.6666755022874533 | 0.7481863684107251 |
| 0.6666605441436363 | 0.3333239718857718 | 0.2518136207453500 |

Pd<sub>3</sub>(AsTe<sub>4</sub>)<sub>2</sub>

1.0000000000000000

|                     |                     |                     |
|---------------------|---------------------|---------------------|
| 7.5689797892637243  | 0.0000216076909168  | 0.0000596140111184  |
| -3.7844716011079242 | 6.5548912041316703  | -0.0000377722140346 |
| 0.0001531040591828  | -0.0000129720805295 | 19.9999994299803880 |

|    |    |    |
|----|----|----|
| As | Pd | Te |
| 2  | 3  | 8  |

Direct

|                    |                    |                    |
|--------------------|--------------------|--------------------|
| 0.6666642427628019 | 0.3333326194283239 | 0.3462876865428320 |
| 0.3333138640785925 | 0.6666527993172540 | 0.6537109105764488 |
| 0.4999894520859402 | 0.4999944029796883 | 0.5000005709346875 |
| 0.5000223885334756 | 0.0000181952777669 | 0.5000098971631927 |
| 0.0000377981284869 | 0.5000231356666678 | 0.4999889153708147 |
| 0.1675986533659438 | 0.8324000609885931 | 0.5738688625735854 |
| 0.8323976448471220 | 0.1675963418822187 | 0.4261322358277443 |
| 0.1675977843883364 | 0.3351979864392782 | 0.5738635903078140 |
| 0.8323988600198249 | 0.6648007356405918 | 0.4261306233054991 |
| 0.6647835064585116 | 0.8323903783616097 | 0.5738734229386874 |
| 0.3351974569106682 | 0.1675942520402371 | 0.4261333678006076 |
| 0.3333340706252402 | 0.6666655399051337 | 0.7741914264493726 |
| 0.6666641657950605 | 0.3333333600726492 | 0.2258084902087149 |
